# Supplementary material
Source: publisher figshare collection journal article supplement (https://springernature.figshare.com/ndownloader/files/13825322)
Supplement: Supplementary file [file 13825322]

**A**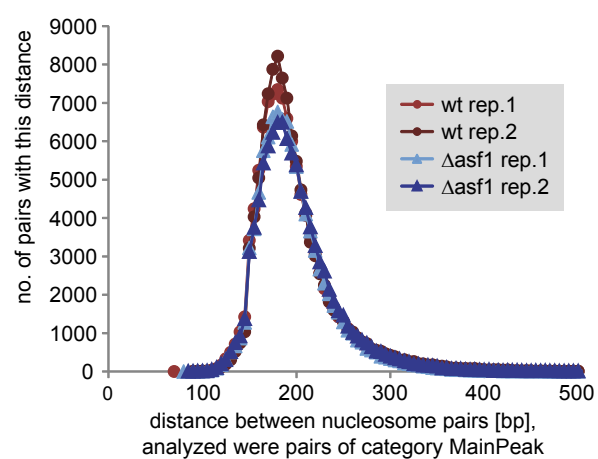**B**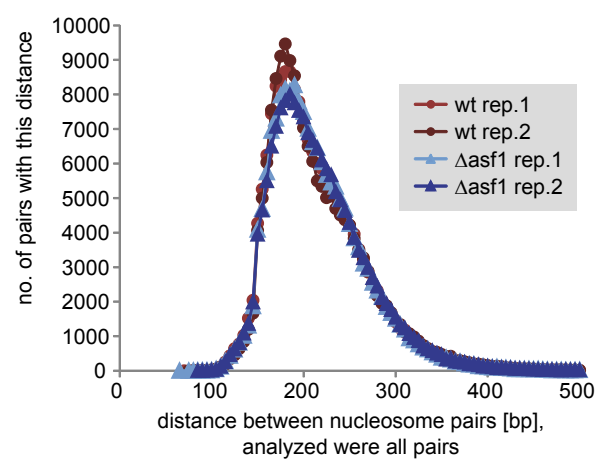**Figure S11**
